# Supplementary material
Source: Research Square preprint supplement (doi:10.21203/rs.3.rs-8072344/v1)
Supplement: Supplementary file 1 [file 3edc7adf029a53fa92cb236f.docx]

**Table S1: Alignment results of long-read sequencing reads of CRFK and PG-4 cells with WT and KIT-FERV1 sequences of KIT intron 1.**

(File Table_S1)

**Table S2: Gene expression levels (transcripts per million) in various tissues estimated from domestic cats (Felis catus) in the Ensembl database (https://ftp.ensembl.org/pub/data_files/felis_catus/F.catus_Fca126_mat1.0/rnaseq/)**

(File Table_S2)
